# Supplementary material for: Genotype by Environment Interactions (G*E) of Chickens Tested in Ethiopia Using Body Weight as a Performance Trait
Source: MDPI journal article supplement (doi:10.3390/ani13193121), 2023-10-06
Supplement: s1 [file s1]

**Table S1.** Means and standard deviations (Sd) of predicted body weights (in grams) based on measurements at a number of households (N), at four different ages (90, 120, 150 and 180 days) per strain (Horro, Koekoek, Kuroiler, Sasso-Rhode Island Red (S-RIR) and Sasso) per sex (F is female and M is male) are given per environment (Ethiopian regions or Agro-Ecological Zones (AEZ)) analyzed. Five Ethiopian regions (Addis Ababa (AA), Amhara (AM), Oromia (OM), South Region (SR) and Tigray (TG)) and three AEZ (cool humid, cool sub humid and warm semi-arid) are analyzed. Means derived after data cleaning with values of Table 4.

|          |     | Region:  | AA  |               | AM  |               | OM  |               | SR  |               | TG  |               |
|----------|-----|----------|-----|---------------|-----|---------------|-----|---------------|-----|---------------|-----|---------------|
| Age days | Sex | Strain   | N   | Mean(Sd)      |
| 90       | F   | Horro    | 38  | 444.4(199.9)  | 30  | 333.7(336.8)  | 47  | 607.7(276.3)  | 17  | 612.4(389.6)  | -   | -             |
|          |     | Koekoek  | 82  | 736.2(262.4)  | 108 | 620.6(219.9)  | 62  | 606.0(191.3)  | 33  | 451.4(161.5)  | -   | -             |
|          |     | Kuroiler | 35  | 508.4(252.5)  | 100 | 790.0(253.5)  | 8   | 822.0(589.9)  | 34  | 675.0(207.7)  | -   | -             |
|          |     | S-RIR    | 43  | 725.7(193.0)  | 101 | 654.7(283.8)  | 16  | 670.9(505.1)  | 32  | 666.9(354.6)  | -   | -             |
|          |     | Sasso    | -   | -             | 95  | 955.9(315.2)  | 31  | 1017.6(474.9) | 32  | 471.9(156.2)  | -   | -             |
|          |     | Tot      | 198 | 637.7(265.8)  | 434 | 721.2(318.7)  | 164 | 701.2(375.5)  | 148 | 572.3(271.3)  | -   | -             |
|          | M   | Horro    | 32  | 430.8(170.4)  | 25  | 255.7(27.4)   | 29  | 544.6(114.8)  | 30  | 638.6(185.2)  | 8   | 866.7(281.3)  |
|          |     | Koekoek  | 61  | 727.2(242.2)  | 85  | 717.7(264.1)  | 35  | 569.9(113.3)  | 39  | 727.2(526.0)  | 73  | 894.2(350.6)  |
|          |     | Kuroiler | -   | -             | 62  | 995.2(401.2)  | 5   | 822.0(415.7)  | 63  | 831.7(342.8)  | 44  | 870.8(172.3)  |
|          |     | S-RIR    | 39  | 825.6(261.2)  | 65  | 714.6(281.7)  | 8   | 509.3(291.0)  | 63  | 688.7(235.1)  | 43  | 766.2(190.8)  |
|          |     | Sasso    | -   | -             | 71  | 1116.2(490.0) | 5   | 1170.2(376.0) | 60  | 691.2(380.3)  | 9   | 976.6(169.9)  |
|          |     | Tot      | 132 | 684.4(275.7)  | 308 | 827.3(424.3)  | 82  | 607.0(241.1)  | 255 | 724.6(354.1)  | 177 | 860.3(272.1)  |
|          | Tot |          | 330 | 656.4(270.4)  | 742 | 765.2(369.7)  | 246 | 669.8(339.1)  | 403 | 668.7(334.0)  | 177 | 860.3(272.1)  |
| 120      | F   | Horro    | 37  | 637.1(129.1)  | 7   | 805.9(819.8)  | 44  | 729.2(212.5)  | 21  | 714.0(237.7)  | -   | -             |
|          |     | Koekoek  | 82  | 1044.0(237.0) | 108 | 1021.9(453.3) | 62  | 747.4(154.1)  | 35  | 639.2(167.2)  | -   | -             |
|          |     | Kuroiler | 7   | 2025.7(849.0) | 96  | 1072.9(374.5) | 7   | 1080.9(629.2) | 31  | 881.8(337.7)  | -   | -             |
|          |     | S-RIR    | 43  | 1106.4(256.9) | 95  | 930.1(411.0)  | 13  | 676.0(287.8)  | 32  | 892.6(407.2)  | -   | -             |
|          |     | Sasso    | -   | -             | 98  | 1192.9(421.4) | 35  | 1608.0(689.1) | 34  | 899.2(632.3)  | -   | -             |
|          |     | Tot      | 169 | 1011.5(386.6) | 404 | 1050.2(435.3) | 161 | 938.3(523.3)  | 153 | 809.4(411.2)  | -   | -             |
|          | M   | Horro    | 32  | 691.1(195.9)  | 3   | 324.3(35.0)   | 27  | 742.9(166.0)  | 30  | 947.5(331.0)  | 8   | 851.1(137.1)  |
|          |     | Koekoek  | 63  | 1120.6(303.1) | 85  | 1116.4(479.6) | 37  | 744.2(121.1)  | 38  | 935.7(390.2)  | 73  | 1176.4(360.7) |
|          |     | Kuroiler | 1   | 2437.5(-)     | 59  | 1285.1(512.7) | 4   | 1078.6(446.3) | 62  | 1039.8(379.5) | 44  | 1222.3(275.1) |
|          |     | S-RIR    | 40  | 1306.1(330.8) | 64  | 1071.3(407.9) | 8   | 620.4(222.8)  | 64  | 936.0(433.3)  | 43  | 1015.2(242.7) |
|          |     | Sasso    | -   | -             | 71  | 1297.2(551.4) | 4   | 1701.8(313.2) | 61  | 916.8(397.5)  | 9   | 1775.7(394.7) |
|          |     | Tot      | 136 | 1083.8(384.7) | 282 | 1178.5(503.6) | 80  | 796.0(287.0)  | 255 | 957.9(394.3)  | 177 | 1164.4(351.5) |
|          | Tot |          | 305 | 1043.7(386.8) | 686 | 1102.9(468.5) | 241 | 891.0(462.8)  | 408 | 902.2(406.6)  | 177 | 1164.4(351.5) |
| 150      | F   | Horro    | 39  | 1046.6(425.3) | 26  | 582.6(430.4)  | 44  | 861.3(189.5)  | 23  | 1057.8(400.7) | -   | -             |
|          |     | Koekoek  | 82  | 1445.3(474.9) | 108 | 1236.0(491.3) | 62  | 915.0(192.6)  | 35  | 997.1(251.9)  | -   | -             |
|          |     | Kuroiler | 11  | 1651.5(900.0) | 96  | 1375.5(514.2) | 8   | 1320.2(608.6) | 33  | 1003.5(309.1) | -   | -             |
|          |     | S-RIR    | 43  | 1551.0(444.4) | 96  | 1193.7(453.0) | 16  | 750.0(176.3)  | 33  | 997.6(331.6)  | -   | -             |
|          |     | Sasso    | -   | -             | 98  | 1488.7(503.6) | 38  | 1954.1(621.6) | 34  | 1129.8(451.5) | -   | -             |
|          |     | Tot      | 175 | 1395.4(526.6) | 424 | 1276.3(529.0) | 168 | 1139.6(577.0) | 158 | 1035.9(351.9) | -   | -             |
|          | M   | Horro    | 32  | 991.8(271.4)  | 25  | 470.3(45.0)   | 27  | 881.2(218.8)  | 30  | 1283.8(478.5) | 8   | 1134.9(356.5) |
|          |     | Koekoek  | 63  | 1636.6(477.3) | 83  | 1423.8(564.6) | 37  | 944.3(202.2)  | 36  | 1230.6(404.1) | 73  | 1457.0(406.5) |
|          |     | Kuroiler | 1   | 2125.0(-)     | 60  | 1711.5(653.0) | 6   | 1701.7(519.3) | 61  | 1278.3(485.4) | 44  | 1610.9(406.5) |
|          |     | S-RIR    | 40  | 1680.4(365.1) | 65  | 1410.8(604.7) | 8   | 804.4(151.5)  | 65  | 1183.2(526.6) | 43  | 1379.9(438.4) |
|          |     | Sasso    | -   | -             | 72  | 1515.1(600.6) | 5   | 2165.6(636.7) | 59  | 1133.6(479.8) | 9   | 2080.6(408.7) |
|          |     | Tot      | 136 | 1501.3(490.5) | 305 | 1421.0(650.6) | 83  | 1038.6(445.5) | 251 | 1213.5(483.5) | 177 | 1493.7(444.0) |
|          | Tot |          | 311 | 1441.7(513.0) | 729 | 1336.9(586.9) | 251 | 1106.2(538.3) | 409 | 1144.9(445.4) | 177 | 1493.7(444.0) |
| 180      | F   | Horro    | 38  | 1297.7(418.6) | 41  | 717.0(336.6)  | 45  | 965.0(209.9)  | 22  | 1419.3(522.5) | -   | -             |
|          |     | Koekoek  | 82  | 1777.7(519.0) | 105 | 1559.2(554.4) | 61  | 1040.4(260.0) | 35  | 1474.4(491.2) | -   | -             |
|          |     | Kuroiler | 40  | 1704.8(580.4) | 99  | 1658.7(555.7) | 8   | 1726.5(559.7) | 35  | 1150.0(329.3) | -   | -             |
|          |     | S-RIR    | 43  | 2025.6(475.1) | 103 | 1457.3(488.6) | 16  | 1259.2(313.0) | 33  | 1234.0(373.5) | -   | -             |
|          |     | Sasso    | -   | -             | 98  | 1817.3(533.1) | 40  | 2233.5(587.3) | 35  | 1451.7(555.4) | -   | -             |
|          |     | Tot      | 203 | 1726.0(553.9) | 446 | 1537.0(592.3) | 170 | 1354.0(634.9) | 160 | 1341.3(471.9) | -   | -             |
|          | M   | Horro    | 32  | 1302.0(435.8) | 34  | 697.1(141.5)  | 26  | 988.5(285.1)  | 28  | 1559.5(506.4) | 8   | 1455.7(650.2) |
|          |     | Koekoek  | 63  | 2093.7(753.9) | 81  | 1779.9(703.2) | 36  | 1102.2(340.9) | 38  | 1425.3(429.5) | 73  | 1764.4(492.2) |
|          |     | Kuroiler | 2   | 1990.9(252.2) | 60  | 2124.6(827.6) | 7   | 2124.6(574.2) | 59  | 1562.4(649.6) | 44  | 2109.7(423.2) |
|          |     | S-RIR    | 40  | 2080.6(551.4) | 63  | 1759.6(773.4) | 8   | 1213.4(298.5) | 65  | 1488.0(725.6) | 41  | 1885.4(694.7) |
|          |     | Sasso    | -   | -             | 72  | 1959.1(714.7) | 5   | 2123.9(980.4) | 58  | 1375.8(666.1) | 9   | 2369.7(706.0) |
|          |     | Tot      | 137 | 1903.4(708.0) | 310 | 1765.3(811.0) | 82  | 1226.6(547.2) | 248 | 1477.9(631.7) | 175 | 1896.6(578.6) |
|          | Tot |          | 340 | 1797.5(625.7) | 756 | 1630.7(699.0) | 252 | 1312.6(609.6) | 408 | 1424.4(577.6) | 175 | 1896.6(578.6) |

|             |     | AEZ:     | cool humid |               | cool sub humid |               | warm semi-arid |              |
|-------------|-----|----------|------------|---------------|----------------|---------------|----------------|--------------|
| Age<br>days | Sex | Strain   | N          | Mean(Sd)      | N              | Mean(Sd)      | N              | Mean(Sd)     |
| 90          | F   | Horro    | 68         | 395.6(272.5)  | 45             | 648.0(358.2)  | 19             | 516.5(59.4)  |
|             |     | Koekoek  | 138        | 665.3(257.4)  | 120            | 607.3(227.0)  | 27             | 562.2(103.4) |
|             |     | Kuroiler | 92         | 651.5(225.9)  | 85             | 781.0(331.0)  | -              | -            |
|             |     | S-RIR    | 92         | 696.0(256.2)  | 100            | 653.8(340.0)  | -              | -            |
|             |     | Sasso    | 52         | 911.1(269.4)  | 106            | 849.8(430.7)  | -              | -            |
|             |     | Tot      | 442        | 656.2(287.8)  | 456            | 710.3(351.3)  | 46             | 543.3(90.0)  |
|             | M   | Horro    | 57         | 354.0(155.2)  | 48             | 659.1(221.7)  | 19             | 539.4(63.4)  |
|             |     | Koekoek  | 102        | 687.5(277.2)  | 164            | 815.7(366.4)  | 27             | 557.3(91.7)  |
|             |     | Kuroiler | 28         | 1014.0(335.6) | 146            | 877.6(337.5)  | -              | -            |
|             |     | S-RIR    | 57         | 805.2(240.0)  | 161            | 702.8(255.9)  | -              | -            |
|             |     | Sasso    | 36         | 905.2(381.5)  | 109            | 942.8(501.8)  | -              | -            |
|             |     | Tot      | 280        | 704.2(339.8)  | 628            | 811.3(365.8)  | 46             | 549.9(80.9)  |
|             | Tot |          | 722        | 674.8(309.7)  | 1084           | 768.8(363.1)  | 92             | 546.6(85.2)  |
| 120         | F   | Horro    | 44         | 664.0(334.1)  | 46             | 753.4(252.4)  | 19             | 653.7(63.8)  |
|             |     | Koekoek  | 138        | 1027.8(306.3) | 112            | 856.5(397.9)  | 27             | 679.8(101.0) |
|             |     | Kuroiler | 60         | 1105.7(457.5) | 81             | 1058.4(480.9) | -              | -            |
|             |     | S-RIR    | 87         | 1005.7(350.0) | 96             | 893.6(408.4)  | -              | -            |
|             |     | Sasso    | 52         | 1091.9(300.9) | 115            | 1278.0(659.3) | -              | -            |
|             |     | Tot      | 381        | 1001.8(367.6) | 460            | 994.9(514.4)  | 46             | 669.0(87.7)  |
|             | M   | Horro    | 35         | 659.7(214.3)  | 46             | 912.7(296.3)  | 19             | 700.4(59.7)  |
|             |     | Koekoek  | 102        | 1088.8(350.3) | 167            | 1102.2(425.6) | 27             | 715.5(100.6) |
|             |     | Kuroiler | 28         | 1191.5(355.0) | 142            | 1179.3(446.0) | -              | -            |
|             |     | S-RIR    | 58         | 1223.5(313.5) | 161            | 983.6(405.9)  | -              | -            |
|             |     | Sasso    | 36         | 1063.2(368.9) | 109            | 1215.9(580.5) | -              | -            |
|             |     | Tot      | 259        | 1068.5(370.6) | 625            | 1095.1(458.1) | 46             | 709.3(85.6)  |
|             | Tot |          | 640        | 1028.8(369.9) | 1085           | 1052.6(485.1) | 92             | 689.1(88.5)  |
| 150         | F   | Horro    | 65         | 861.0(481.9)  | 48             | 991.3(323.7)  | 19             | 770.9(63.9)  |
|             |     | Koekoek  | 138        | 1345.9(471.8) | 122            | 1116.2(419.0) | 27             | 804.4(107.8) |
|             |     | Kuroiler | 64         | 1269.7(459.4) | 84             | 1340.8(603.0) | -              | -            |
|             |     | S-RIR    | 87         | 1298.1(431.2) | 101            | 1121.6(492.2) | -              | -            |
|             |     | Sasso    | 52         | 1407.5(492.1) | 118            | 1570.9(618.4) | -              | -            |
|             |     | Tot      | 406        | 1253.9(496.0) | 473            | 1258.0(554.6) | 46             | 790.5(92.9)  |
|             | M   | Horro    | 57         | 763.1(331.4)  | 46             | 1206.5(448.6) | 19             | 836.1(102.9) |
|             |     | Koekoek  | 101        | 1525.0(520.1) | 164            | 1401.4(462.1) | 27             | 852.4(115.4) |
|             |     | Kuroiler | 29         | 1544.9(448.5) | 143            | 1532.0(586.0) | -              | -            |
|             |     | S-RIR    | 58         | 1566.7(376.0) | 163            | 1292.8(565.8) | -              | -            |
|             |     | Sasso    | 34         | 1190.8(431.5) | 111            | 1486.8(644.5) | -              | -            |
|             |     | Tot      | 279        | 1339.4(537.8) | 627            | 1403.8(561.1) | 46             | 845.7(109.3) |
|             | Tot |          | 685        | 1288.7(514.8) | 1100           | 1341.1(562.7) | 92             | 818.1(104.6) |
| 180         | F   | Horro    | 79         | 996.4(475.9)  | 48             | 1234.7(410.4) | 19             | 809.6(137.9) |
|             |     | Koekoek  | 135        | 1696.1(531.8) | 122            | 1419.0(500.9) | 26             | 863.8(185.8) |
|             |     | Kuroiler | 96         | 1593.0(473.1) | 86             | 1552.7(649.2) | -              | -            |
|             |     | S-RIR    | 94         | 1644.1(527.1) | 101            | 1408.1(530.4) | -              | -            |
|             |     | Sasso    | 52         | 1706.7(536.0) | 121            | 1896.7(626.2) | -              | -            |
|             |     | Tot      | 456        | 1543.7(567.8) | 478            | 1545.9(598.6) | 45             | 840.9(167.7) |
|             | M   | Horro    | 66         | 990.4(439.9)  | 44             | 1475.9(524.7) | 18             | 893.0(140.4) |
|             |     | Koekoek  | 100        | 1954.1(785.9) | 165            | 1687.8(530.5) | 26             | 954.6(220.9) |
|             |     | Kuroiler | 30         | 1957.4(477.1) | 142            | 1919.8(752.9) | -              | -            |
|             |     | S-RIR    | 58         | 1949.1(573.5) | 159            | 1665.1(764.2) | -              | -            |
|             |     | Sasso    | 33         | 1751.5(738.2) | 111            | 1756.8(782.6) | -              | -            |
|             |     | Tot      | 287        | 1708.5(752.3) | 621            | 1732.4(703.2) | 44             | 929.4(192.7) |
|             | Tot |          | 743        | 1607.3(649.8) | 1099           | 1651.3(665.9) | 89             | 884.7(184.9) |
